# Supplementary figures and images for: Inflammation-Driven Regulation of PD-L1 and PD-L2, and Their Cross-Interactions with Protective Soluble TNFα Receptors in Human Triple-Negative Breast Cancer
Source: MDPI journal article supplement (doi:10.3390/cancers14143513), 2022-07-19

Figure 4A

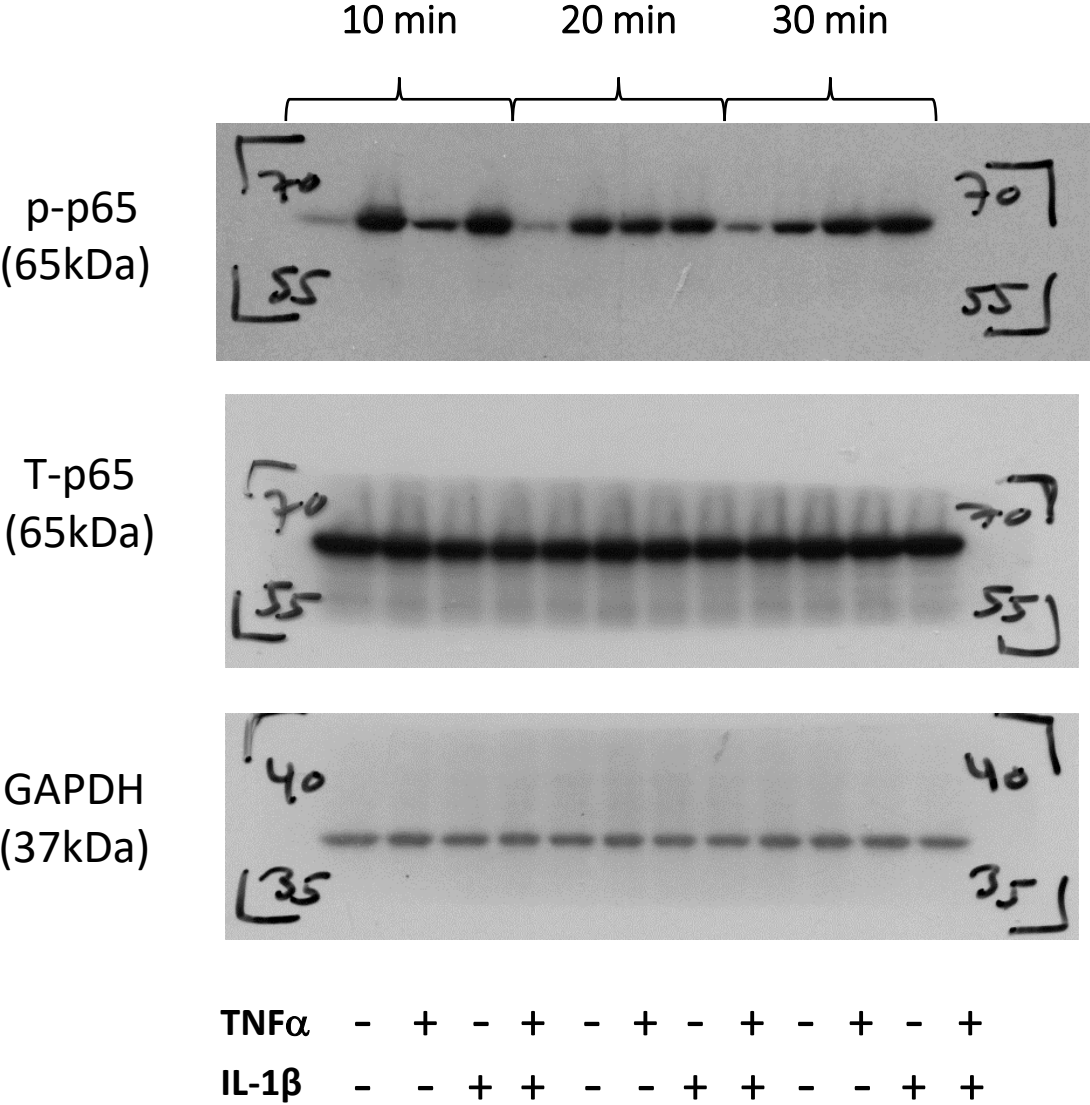

**Figure 4B1**

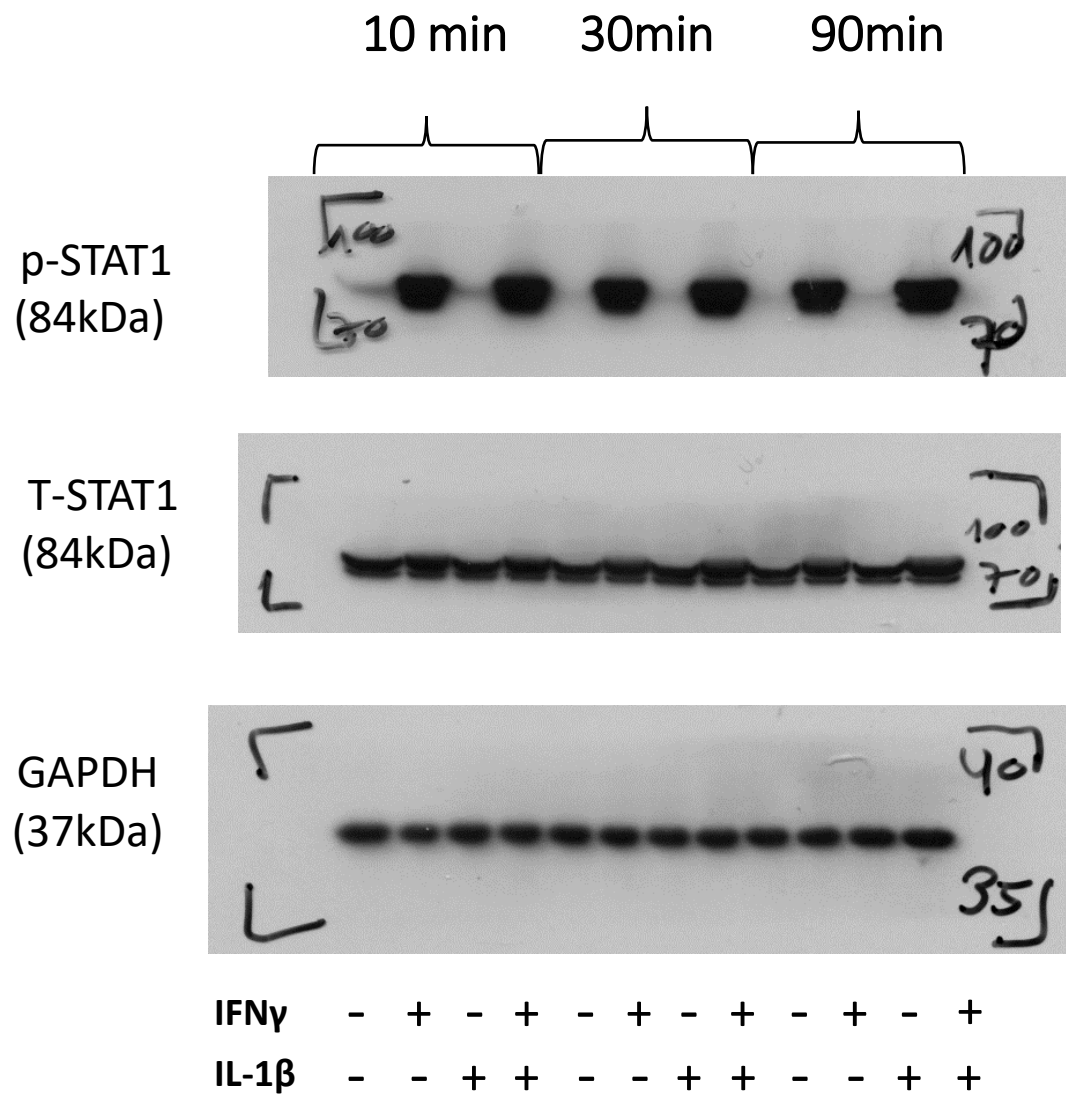

**Figure 4B2**

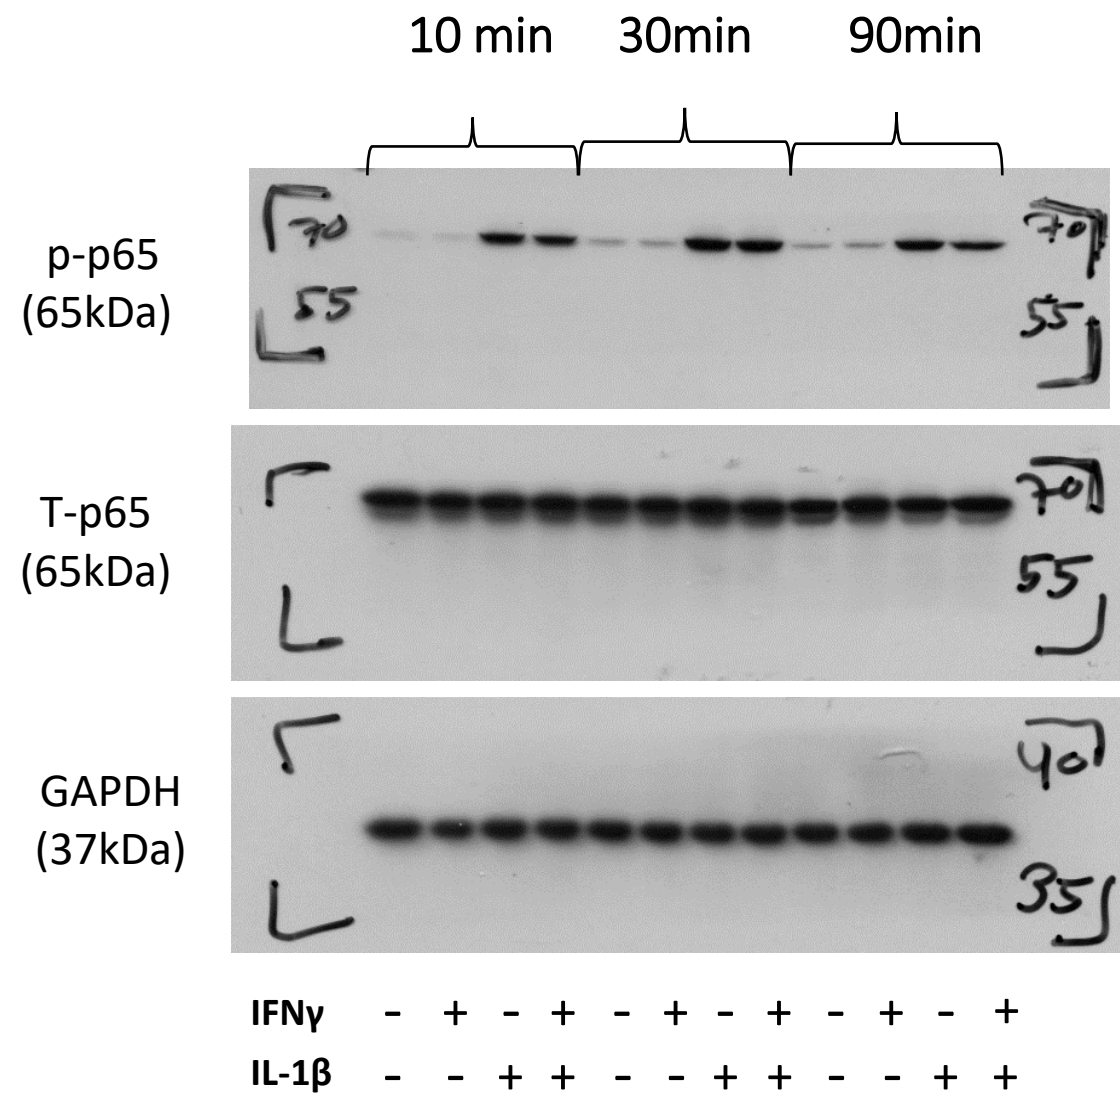

Figure 5A1

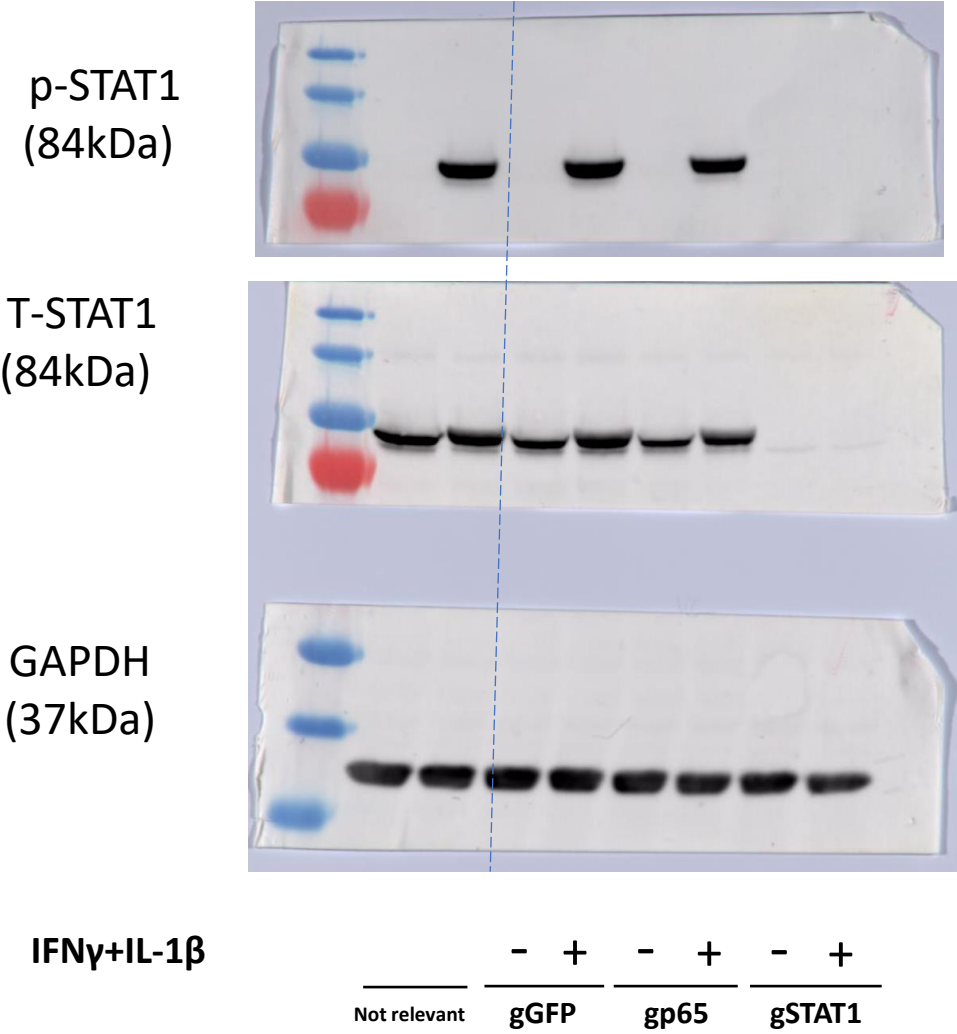

Figure 5A2

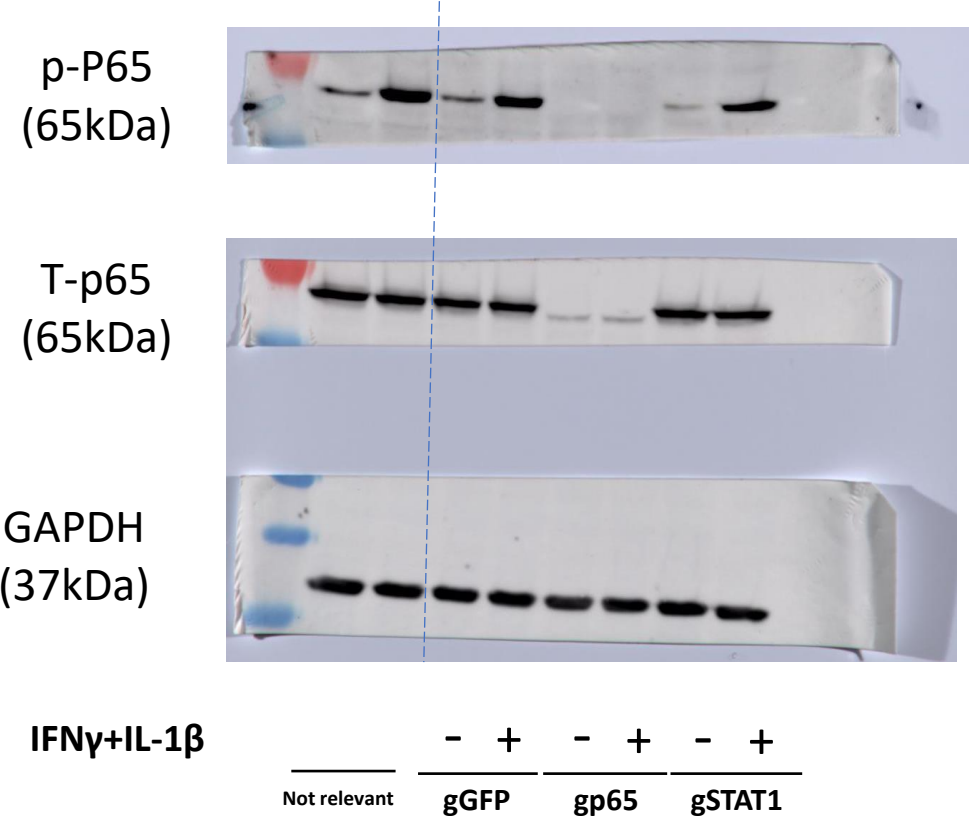

Supplement: s1 [file s1]
